# Supplementary material for: A small bandgap semiconductor, p-type MnV2O6, active for photocatalytic hydrogen and oxygen production
Source: Royal Society of Chemistry journal article supplement (doi:10.1039/c7dt00780a), 2017-01-01
Supplement: c7dt00780a1.pdf [file c7dt00780a1.pdf]

## SUPPORTING INFORMATION

“A small bandgap semiconductor, p-type  $\text{MnV}_2\text{O}_6$ , active for photocatalytic hydrogen and oxygen production”

Brandon Zoellner, Elijah Gordon and Paul A. Maggard\*

*Department of Chemistry, North Carolina State University, Raleigh, NC 27695-8204*

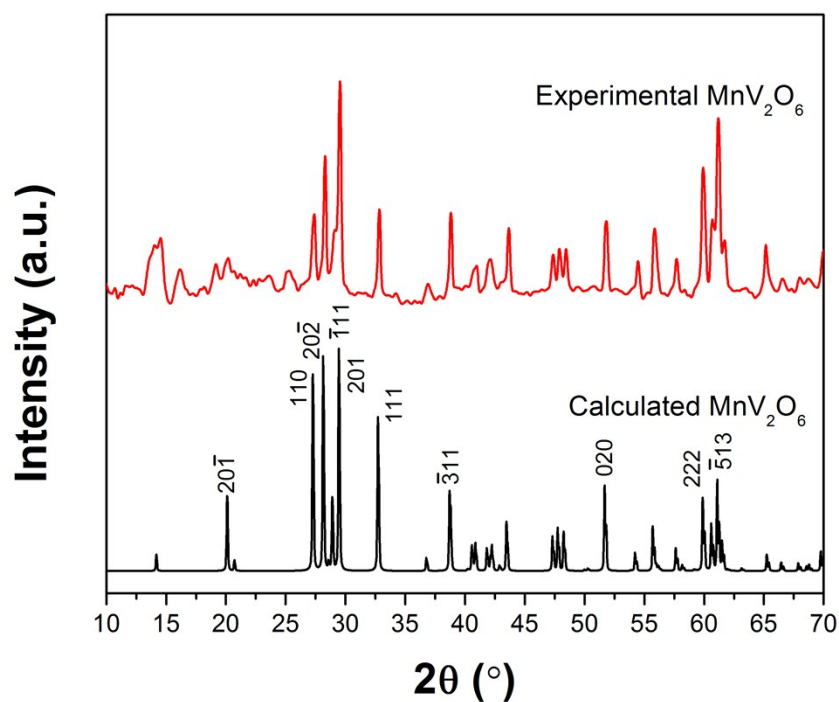

**Figure S1.** X-ray diffraction patterns calculated for  $\text{MnV}_2\text{O}_6$  (lower) and from the powder synthesized product (upper)

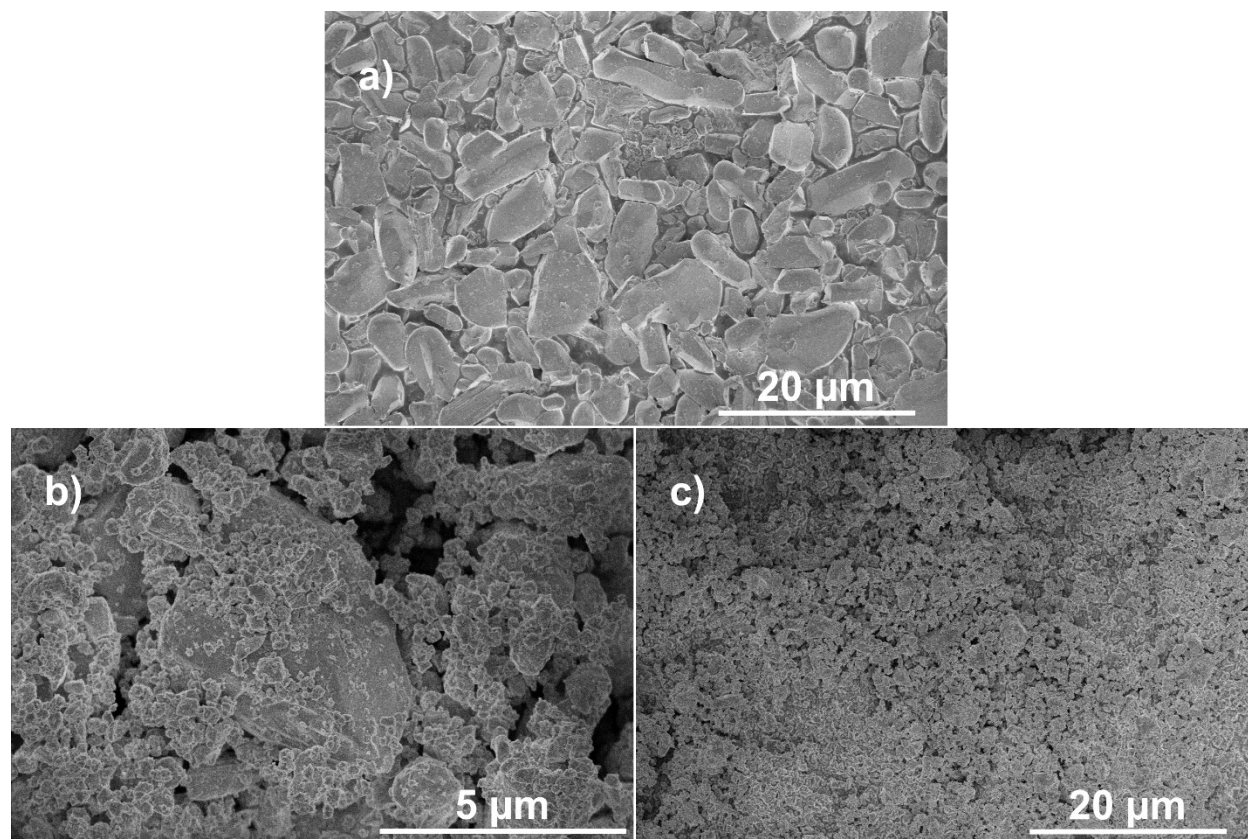

**Figure S2.** Scanning electron microscopy images of particles of  $\text{MnV}_2\text{O}_6$  as synthesized (a) and after grinding in an ethanol slurry (b and c).

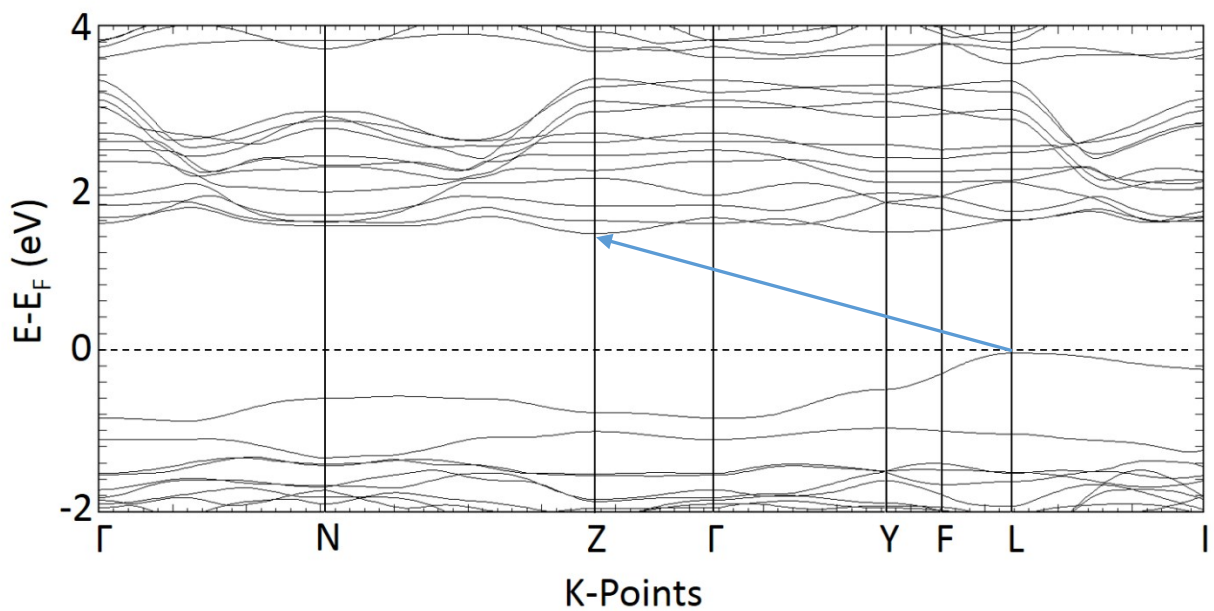

**Figure S3.** Calculated band structure of  $\text{MnV}_2\text{O}_6$  with the indirect bandgap between the L and Z  $k$ -points.

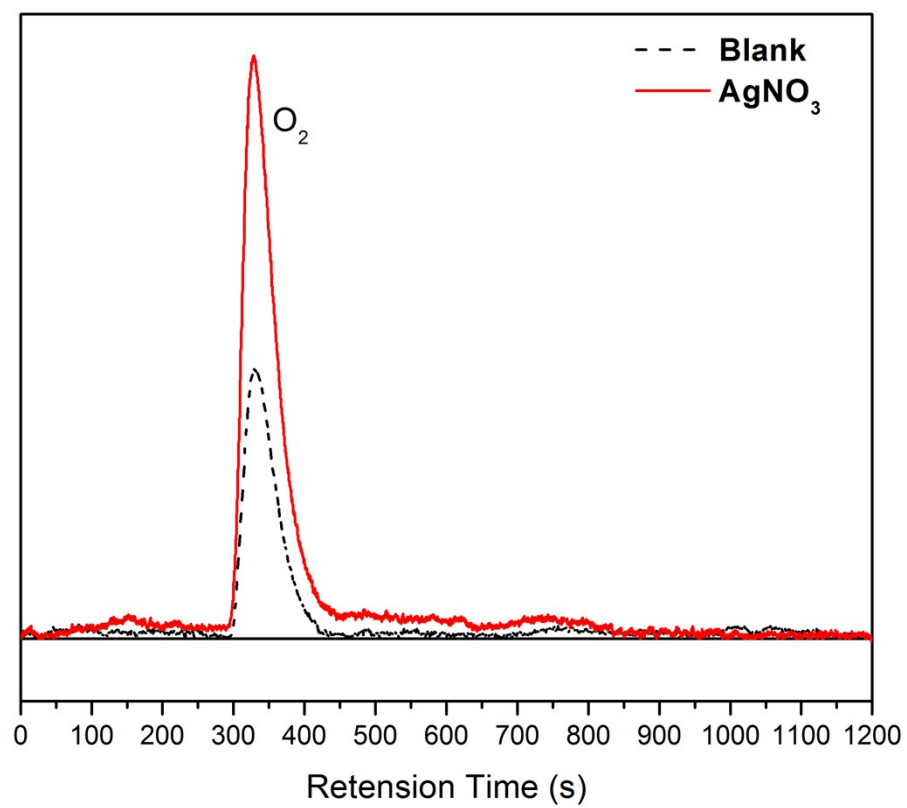

**Figure S4.** Oxygen production from  $MnV_2O_6$  suspended in a solution of 0.05 M  $AgNO_3$  under visible-light irradiation.

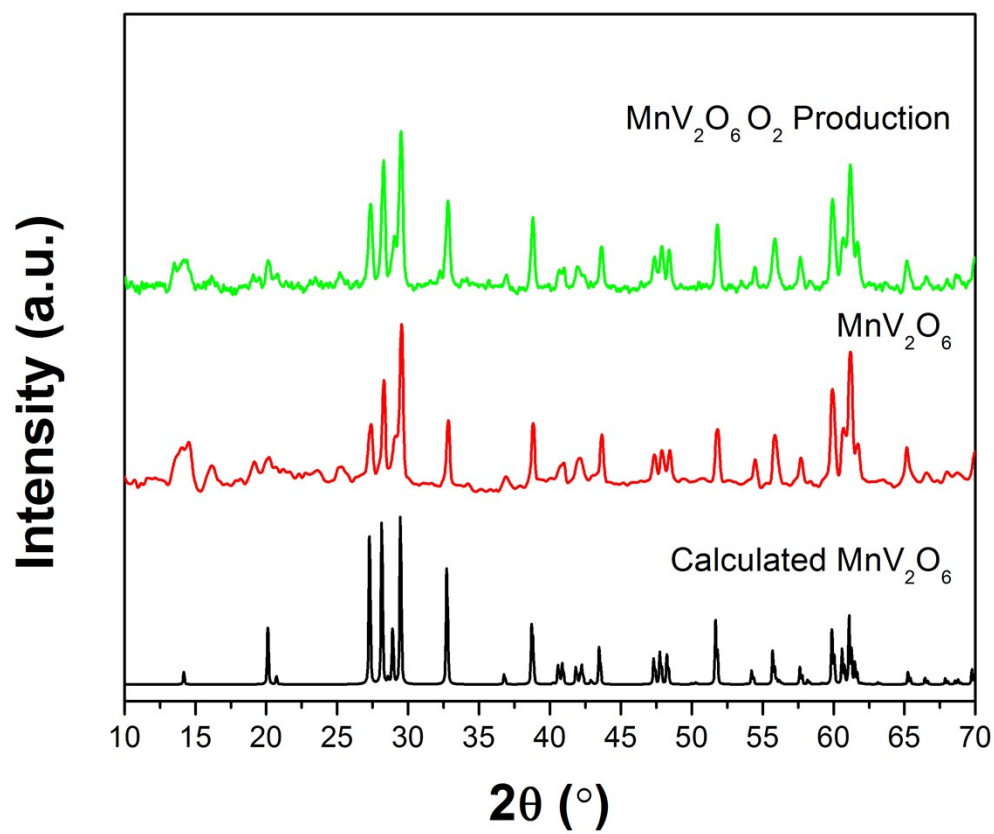

**Figure S5.** Powder X-ray diffraction of samples of  $\text{MnV}_2\text{O}_6$  after oxygen production in 0.05 M  $\text{AgNO}_3$ .

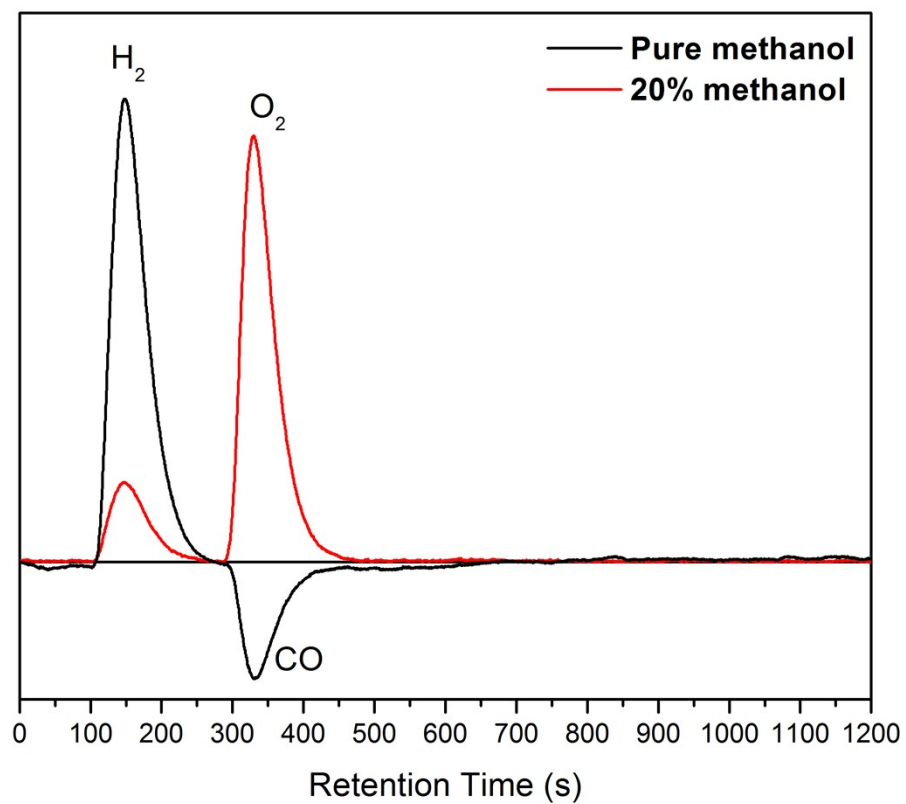

**Figure S6.** Gas Chromatography results of hydrogen production in pure MeOH and 20% MeOH solutions.

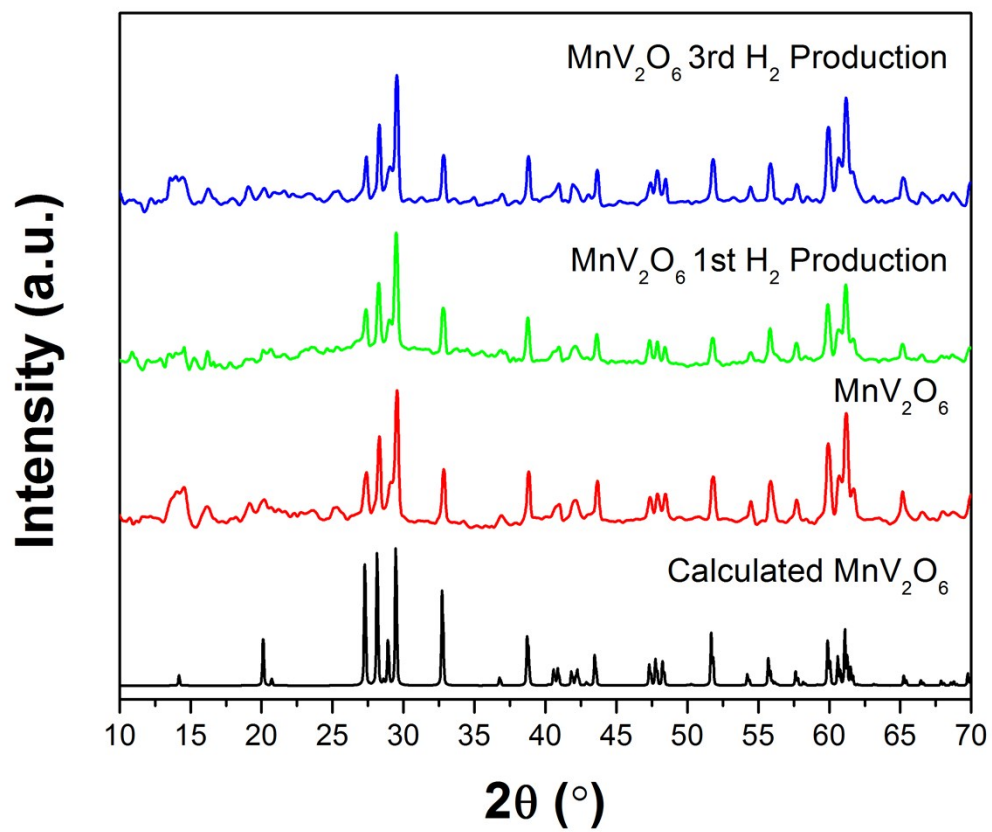

**Figure S7.** Powder X-ray diffraction of samples of MnV<sub>2</sub>O<sub>6</sub> after multiple cycles of hydrogen production in 20% methanol solutions.
